# Supplementary material for: Toward G-Quadruplex-Based Anticancer Agents: Biophysical and Biological Studies of Novel AS1411 Derivatives
Source: Int J Mol Sci. 2020 Oct 21;21(20):7781. doi: 10.3390/ijms21207781 (PMC7590035; doi:10.3390/ijms21207781)
Supplement: Supplementary file 1 [file ijms-21-07781-s001.pdf]

# Toward G-Quadruplex-Based Anticancer Agents: Biophysical and Biological Studies of Novel AS1411 Derivatives

Anna M. Ogloblina <sup>1,2</sup>, Nunzia Iaccarino <sup>2</sup>, Domenica Capasso <sup>3</sup>, Sonia Di Gaetano <sup>4</sup>, Emanuele U. Garzarella <sup>2</sup>, Nina G. Dolinnaya <sup>5</sup>, Marianna G. Yakubovskaya <sup>1</sup>, Bruno Pagano <sup>2,\*</sup>, Jussara Amato <sup>2,\*</sup> and Antonio Randazzo <sup>2</sup>

<sup>1</sup> N.N. Blokhin National Medical Research Center of Oncology, Ministry of Health, 115478 Moscow, Russia; ann.ogloblina@gmail.com (A.M.O.); mgyakubovskaya@mail.ru (M.G.Y.)

<sup>2</sup> Department of Pharmacy, University of Naples Federico II, Via D. Montesano 49, 80131 Naples, Italy; nunzia.iaccarino@unina.it (N.I.); emanueleugo.garzarella@unina.it (E.U.G.); antonio.randazzo@unina.it (A.R.)

<sup>3</sup> Center for Life Sciences and Technologies (CESTEV), University of Naples Federico II, Via A. De Amicis 95, 80145 Naples, Italy; domenica.capasso@unina.it

<sup>4</sup> Institute of Biostructures and Bioimaging, National Research Council, Via Mezzocannone 16, 80134 Naples, Italy; digaletan@unina.it

<sup>5</sup> Department of Chemistry, Lomonosov Moscow State University, 119991 Moscow, Russia; dolinnaya@hotmail.com

\* Correspondence: bruno.pagano@unina.it (B.P.); jussara.amato@unina.it (J.A.); Tel.: +39-081678641 (B.P.); +39-081678630 (J.A.)

| Table of contents | Page |
|-------------------|------|
| Figure S1         | S2   |
| Figure S2         | S3   |
| Figure S3         | S4   |
| Figure S4         | S4   |

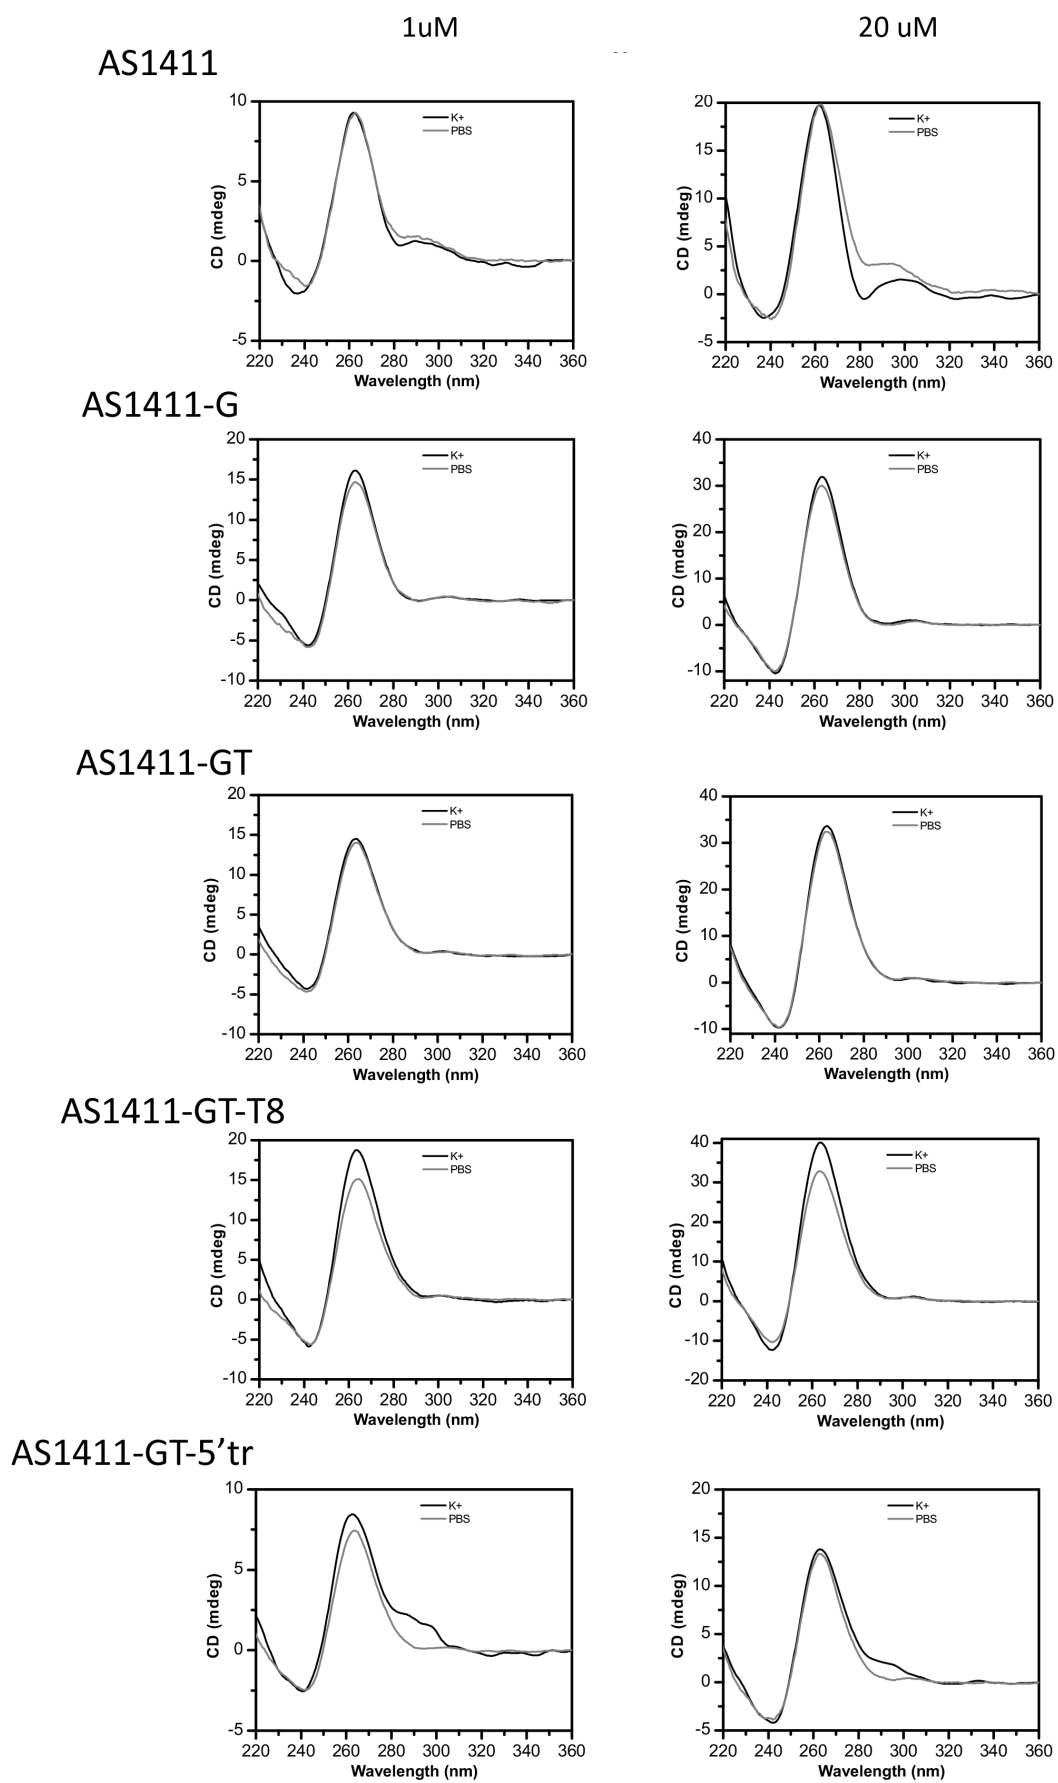

Figure S1. CD spectra of investigated oligonucleotides recorded at 20  $^{\circ}$ C.

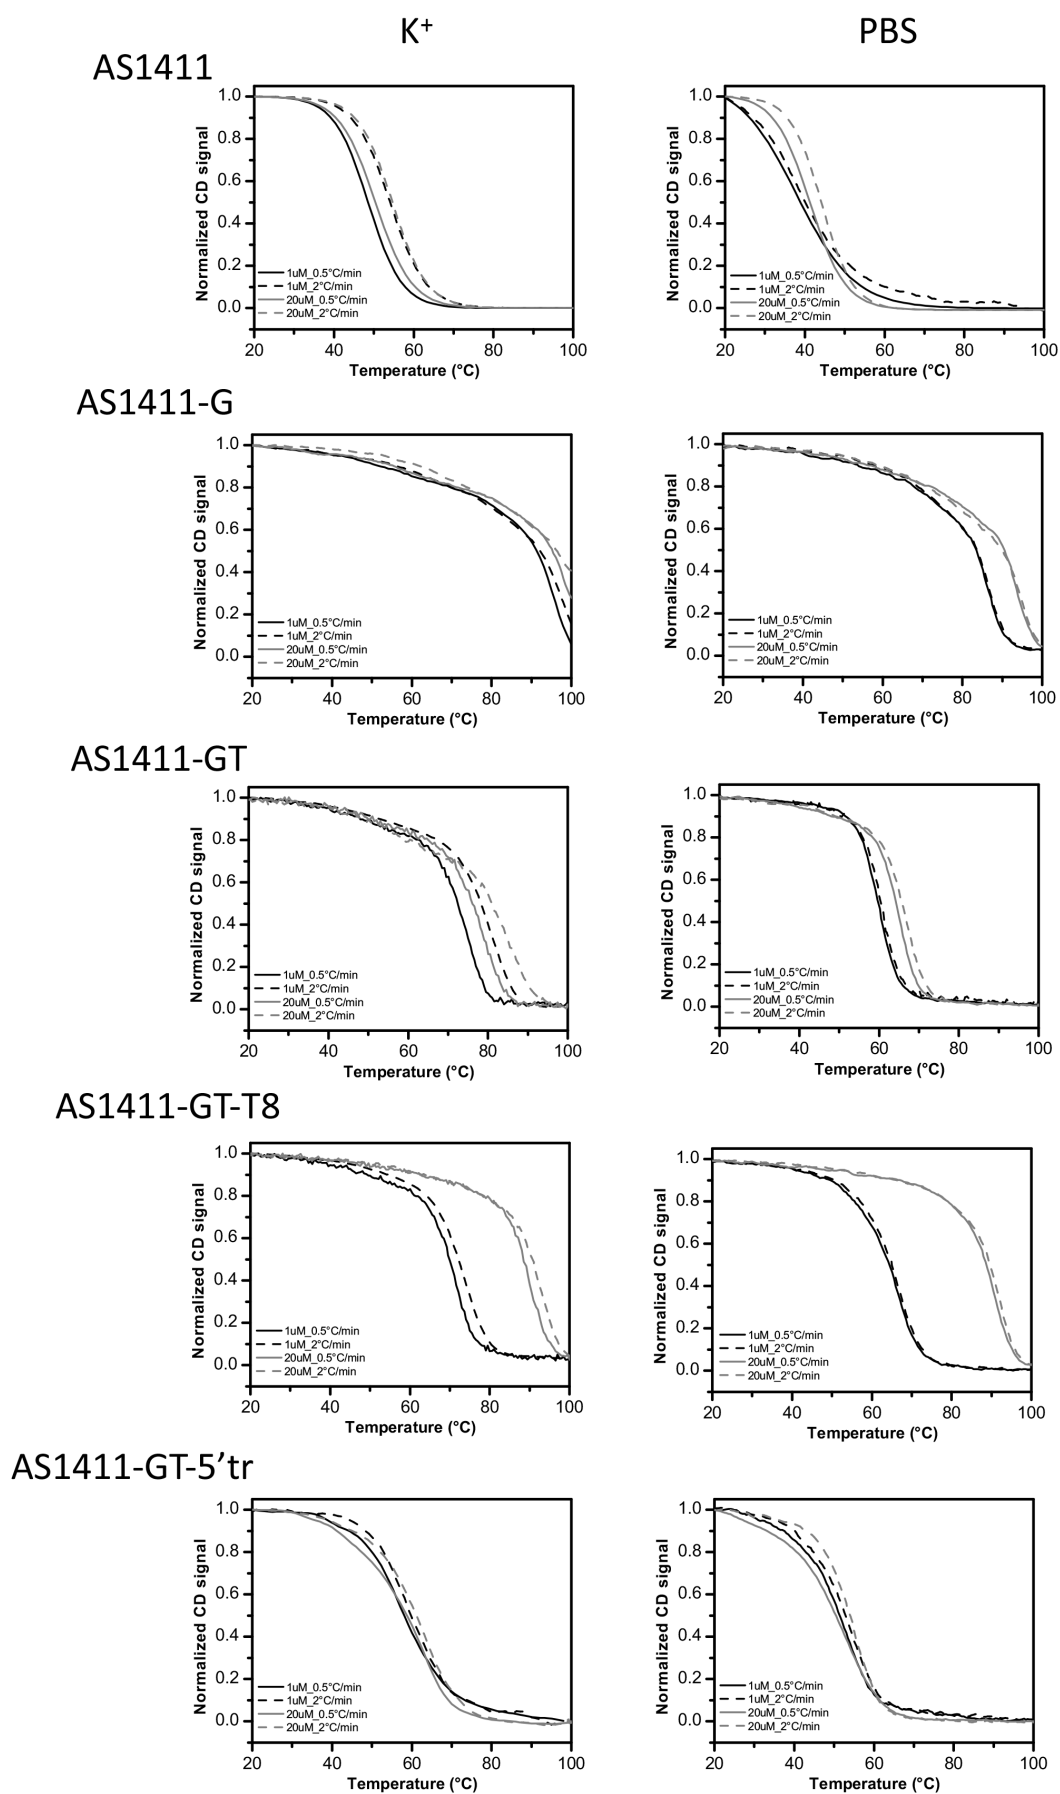

**Figure S2.** CD melting curves of investigated oligonucleotides recorded by following the CD signal at 263 nm.

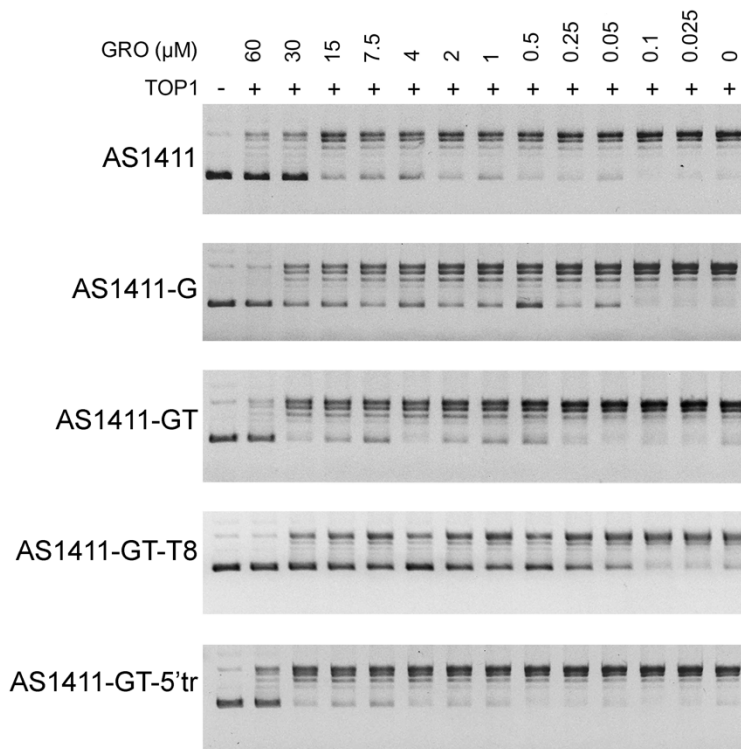

**Figure S3.** TOP1-catalyzed relaxation of supercoiled pUC19 plasmid in the presence of GROs. Topoisomers were separated in 1% agarose gel. The concentration of each GRO ( $\mu\text{M}$ ) is indicated above the corresponding lane. The first lane on the left corresponds to the reaction mixture containing no enzyme. For visualization, gels were stained with ethidium bromide.

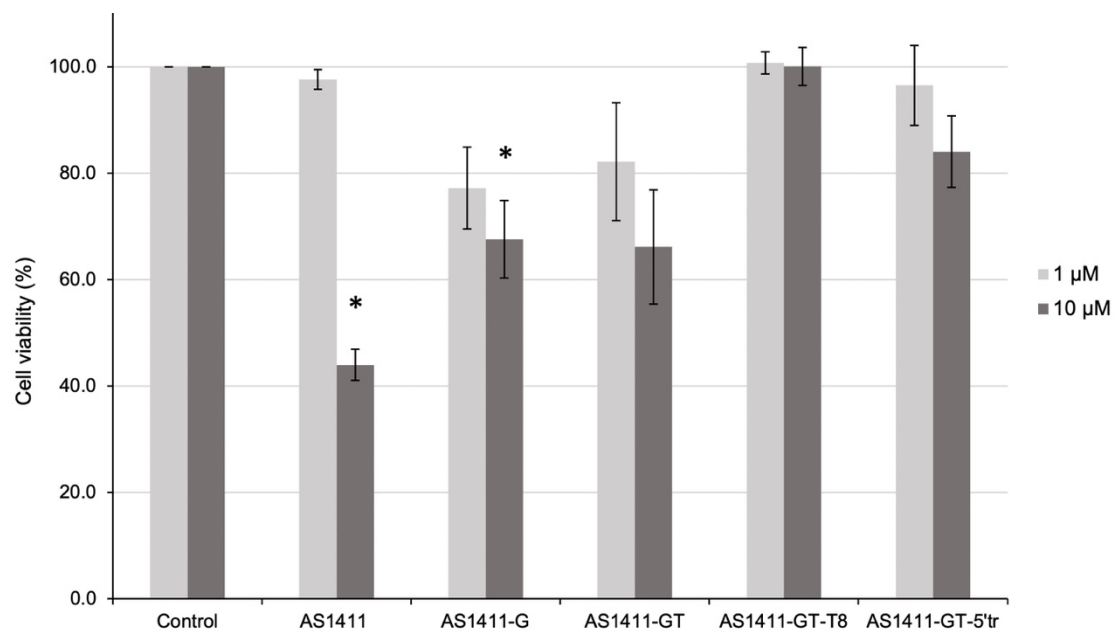

**Figure S4.** Effect of GROs on normal HDF cell proliferation. The cells were incubated at 37 °C in the presence of GROs at 1 or 10  $\mu\text{M}$  concentration for 78 h. The results are presented as the percentage of viable cells with respect to the control (untreated cells) and are expressed as means  $\pm$  SE of at least three independent experiments performed in triplicate, \*  $p < 0.05$ .
